# Supplementary material for: Synthesis of CoFeO mixed oxides via an alginate gelation process as efficient heterogeneous catalysts for lignin depolymerization in water
Source: Royal Society of Chemistry journal article supplement (doi:10.1039/c8cy00576a), 2018-01-01
Supplement: c8cy00576a1.pdf [file c8cy00576a1.pdf]

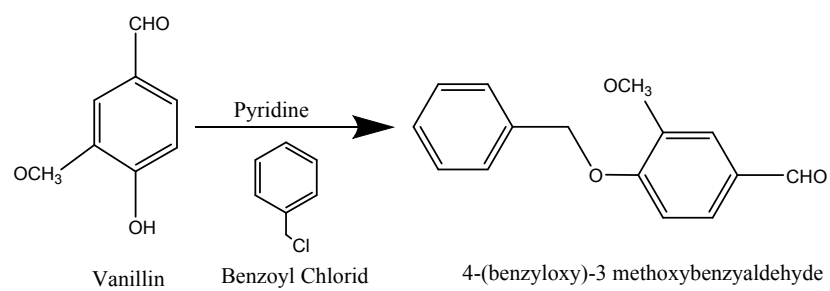

**Fig. S1:** 4-(benzyloxy)-3-methoxybenzaldehyde synthesis reaction

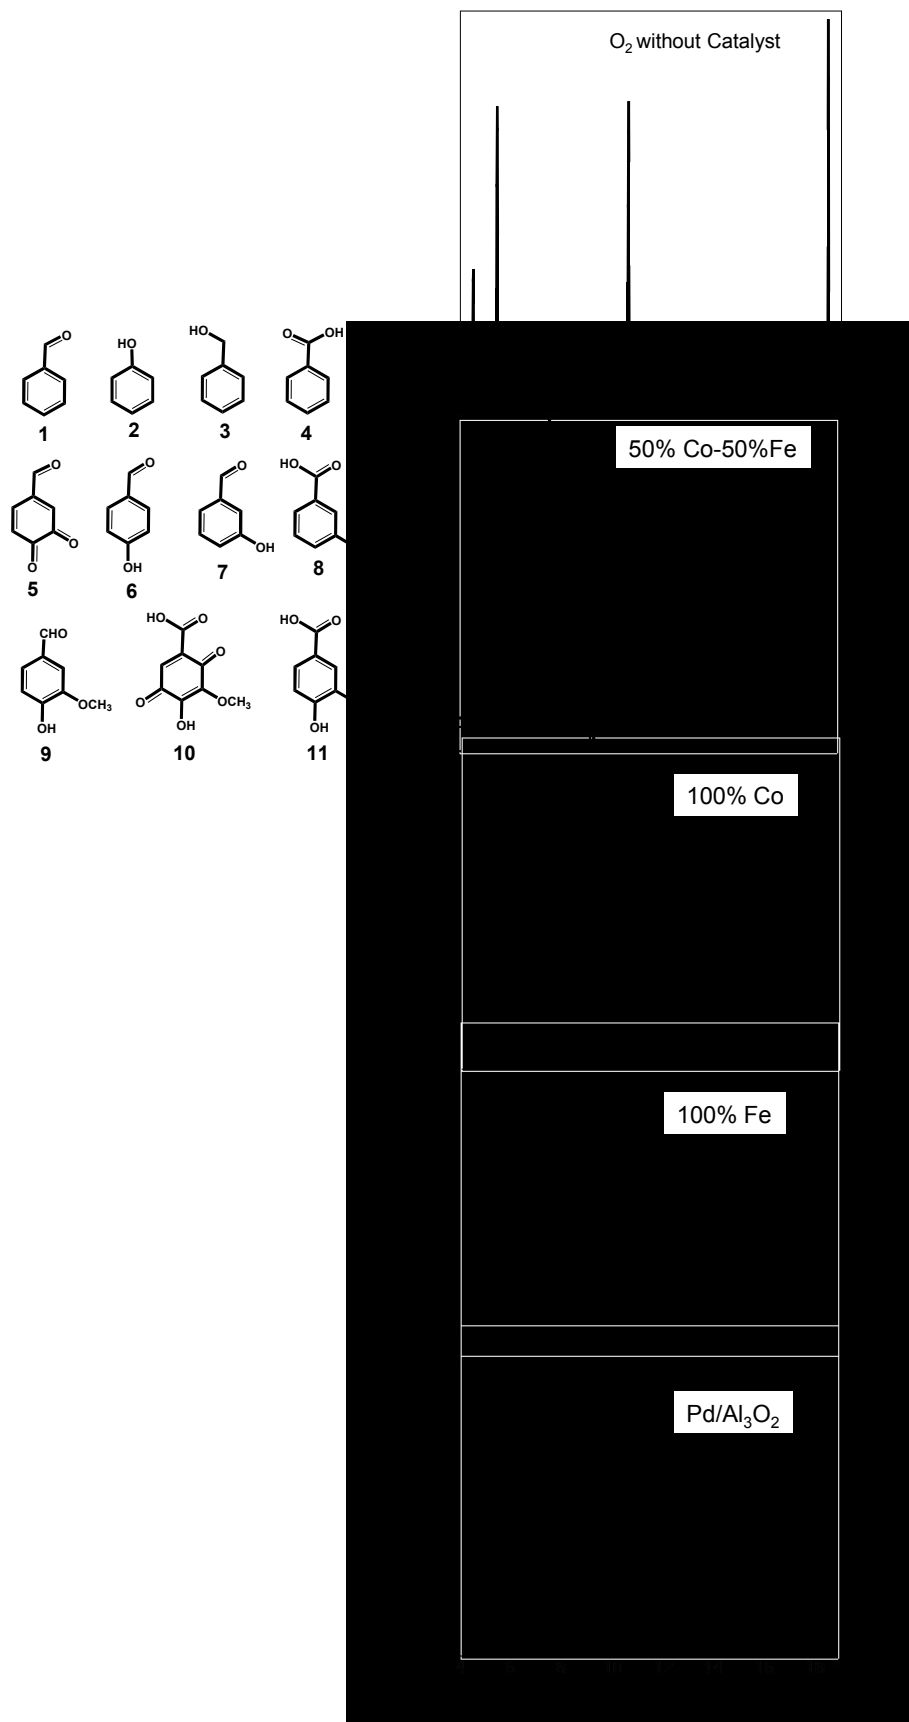

Fig.S2 : GC chromatogrammes of lignin dimer

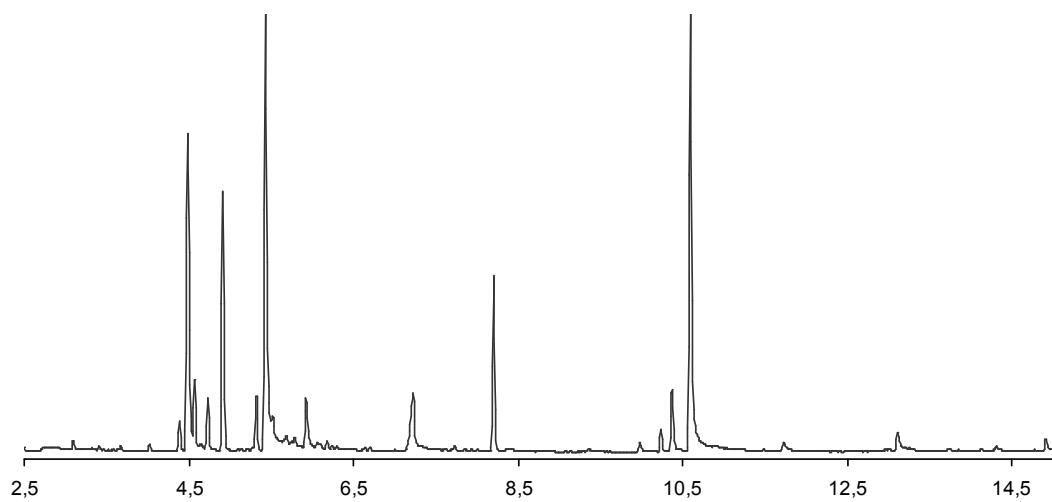

Fig.S3 : GC chromatogrammes of lignin polymer
